# Supplementary material for: Two-dimensional TiO nanosheets with photothermal effects for wound sterilization
Source: Royal Society of Chemistry journal article supplement (doi:10.1039/d3tb01170d), 2023-01-01
Supplement: d3tb01170d1.pdf [file d3tb01170d1.pdf]

## Supporting information

### Two-dimensional TiO nanosheets with photothermal effect for wound sterilization

Wei Zhang<sup>1#</sup>, Hongrang Chen<sup>2#</sup>, Haotian Tian<sup>3#</sup>, Qiang Niu<sup>4</sup>, Jianghao Xing<sup>4</sup>, Tao Wang<sup>5</sup>, Xulin Chen<sup>6</sup>,  
Xianwen Wang<sup>1,4\*</sup>

1. College and Hospital of Stomatology, Anhui Medical University, Key Lab. of Oral Diseases Research of Anhui Province, Hefei 230032, China
2. Department of General Surgery, The First Affiliated Hospital of Anhui Medical University, Hefei, 230032, China.
3. Department of Neurosurgery, The First Affiliated Hospital of Anhui Medical University, Hefei 230032, China.
4. School of Biomedical Engineering, Research and Engineering Center of Biomedical Materials, Anhui Medical University, Hefei, 230032, China.
5. Department of Orthopaedics, The Second Hospital of Anhui Medical University, Hefei 230601, China.
6. Department of Burns, The First Affiliated Hospital of Anhui Medical University, Hefei, 230032, China.

**\*Corresponding Authors:**

mail: [xianwenwang@ahmu.edu.cn](mailto:xianwenwang@ahmu.edu.cn) (X. Wang)

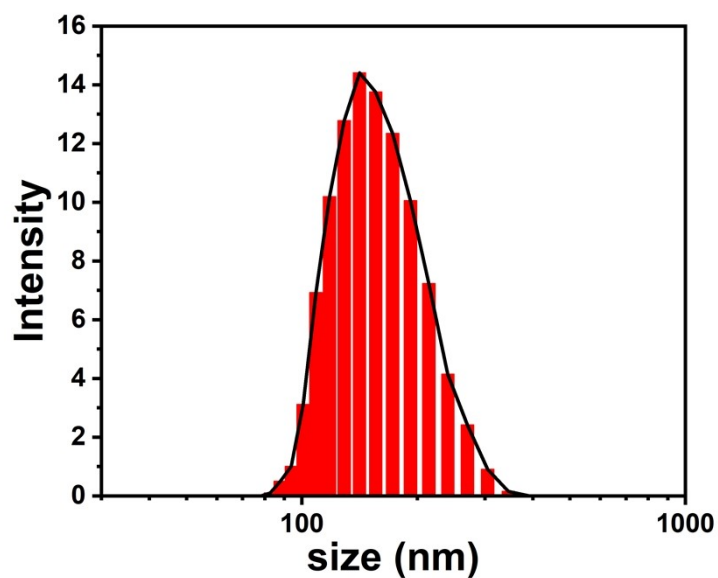

**Figure S1.** Particle size of TiO NSs.

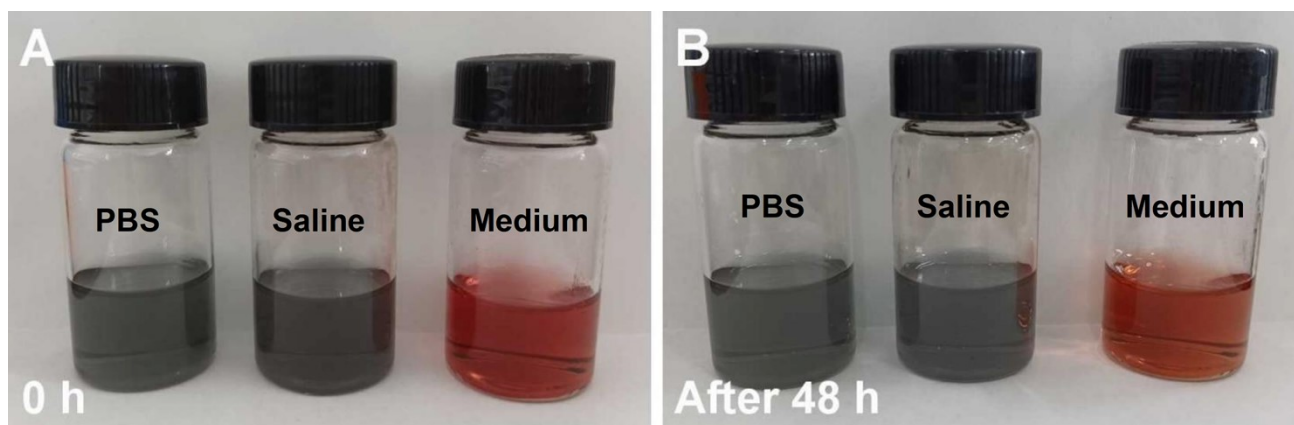

**Figure S2.** The stability of TiO NSs. Digital photos of TiO NS solutions in different dispersants after standing for (A) 0 hours and (B) 48 hours.

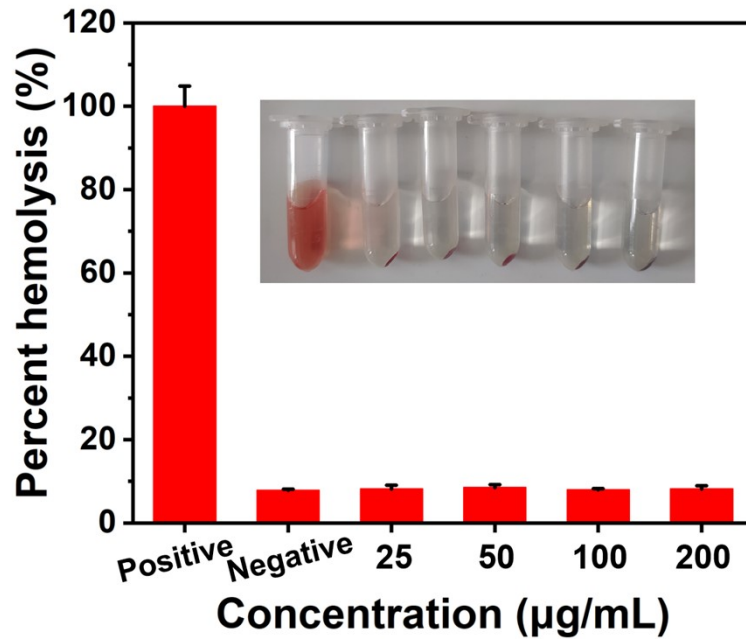

Figure S3. The hemolysis test of TiO NSs.

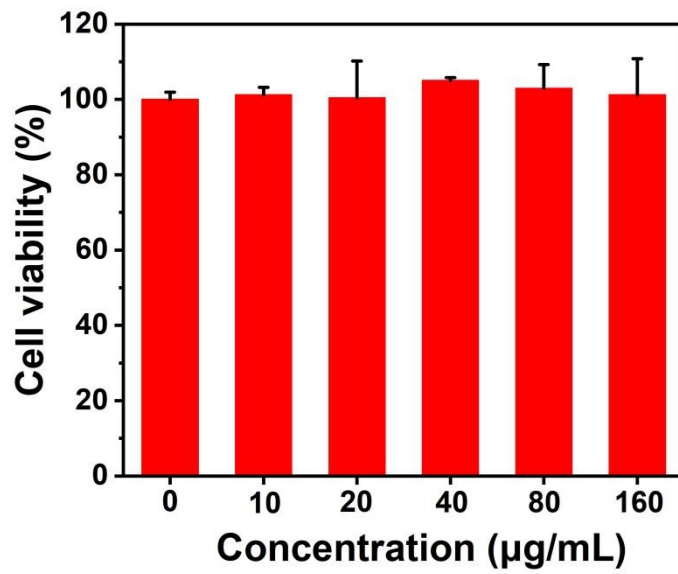

Figure S4. Statistical graph of cell viability under different concentrations of TiO NSs.
